# Supplementary material
Source: Elsevier journal article supplement (https://www.sciencedirect.com/science/article/pii/S2530064422000293)
Supplement: mmc1 [file S2530064422000293:mmc1.docx]

Supplementary Material

*Ant species composition*

There were different numbers of ant species found exclusively on each treatment. However, to fully appreciate the scale of these differences, we need to consider imbalances in the number of plots of some temporal scales. Ten species were found exclusively in burned and two species found exclusively of unburned plots, and there was the same number of burned and unburned plots (five each) (Table S1). There were 14 species exclusive of burned plots in the medium-term and three species found only in unburned plots. However, in the medium-term there were 14 burned and ten unburned plots (Table S1). The species composition was not influenced by fire in the long-term: while there were four species exclusively found in unburned plots versus eight species in burned plots, there was an uneven distribution of plots per treatment (17 burned and seven unburned plots) (Table S1). Overall, there were 61 ant species (14 exclusives) in burned plots and 51 species in unburned plots (four exclusives), considering all temporal scales (Table S1). Again, we need to consider the uneven sampling of plots (36 burned vs. 22 unburned plots). Additionally, some species were found exclusively in a given temporal scale (irrespective of the fire treatment), with one species in the short-term, six in the mid-term, and eight in the long-term (Table S1).
