# Supplementary material
Source: Elsevier journal article supplement (https://www.sciencedirect.com/science/article/pii/S2530064422000293)
Supplement: mmc3 [file S2530064422000293:mmc3.docx]

Table S2. Summary of PERMANOVA. Variation of ant species composition in habitats with different types of disturbance (fire and flood) at different time scales related to burning (short-term, medium-term, and long-term).

|  | | | |
| --- | --- | --- | --- |
| Short-term | | | |
|  | F.Model | R2 | Pr(>F) |
| factor(elevation) | 1.3364 | 0.12568 | 0.234 |
| factor(fire) | 1.9283 | 0.18135 | 0.019* |
| factor(elevation):factor(fire) | 1.3687 | 0.12871 | 0.204 |
| Residuals |  | 0.56426 |  |
| Medium-term | | | |
|  | F.Model | R2 | Pr(>F) |
| factor(elevation) | 0.88521 | 0.03496 | 0.557 |
| factor(fire_2015) | 2.29732 | 0.09073 | 0.007 * |
| factor(elevation):factor(fire_2015) | 1.13659 | 0.04489 | 0.333 |
| Residuals |  | 1 |  |
| Long-term | | | |
|  | F.Model | R2 | Pr(>F) |
| factor(elevation) | 1.03263 | 0.1798 | 0.4426 |
| factor(fire_history) | 0.80716 | 0.03514 | 0.6833 |
| factor(elevation):factor(fire-history) | 1.01163 | 0.13211 | 0.4645 |
| Residuals |  | 0.65295 |  |
